***Wolbachia* infections in *Aedes aegypti* differ markedly in their response to cyclical heat stress**

**Perran A. Ross<sup>1\*</sup>, Itsanun Wiwatanaratnabutr<sup>1,2</sup>, Jason K. Axford<sup>1</sup>, Vanessa L. White<sup>1</sup>, Nancy M. Endersby-Harshman<sup>1</sup> and Ary A. Hoffmann<sup>1</sup>**

<sup>1</sup>Pest and Environmental Adaptation Research Group, Bio21 Institute and the School of BioSciences, The University of Melbourne, Parkville, Victoria, Australia

<sup>2</sup>Department of Plant Production Technology, Faculty of Agricultural Technology, King Mongkut's Institute of Technology Ladkrabang, Bangkok 10520, Thailand

\*Corresponding author

## Abstract

*Aedes aegypti* mosquitoes infected with *Wolbachia* bacteria are currently being released for arbovirus suppression around the world. Their potential to invade populations and persist will depend on interactions with environmental conditions, particularly as larvae are often exposed to fluctuating and extreme temperatures in the field. We reared *Ae. aegypti* larvae infected with different types of *Wolbachia* (*wMel*, *wAlbB* and *wMelPop*) under diurnal cyclical temperatures. Rearing *wMel* and *wMelPop*-infected larvae at 26-37°C reduced the expression of cytoplasmic incompatibility, a reproductive manipulation induced by *Wolbachia*. We also observed a sharp reduction in the density of *Wolbachia* in adults. Furthermore, exposure to 26-37°C over two generations eliminated both the *wMel* and *wMelPop* infections. In contrast, the *wAlbB* infection was maintained at a high density, exhibited complete cytoplasmic incompatibility, and was transmitted from mother to offspring with a high fidelity under this temperature cycle. These findings have implications for the success of *Wolbachia* interventions across different environments and highlight the importance of temperature control in rearing.

## Introduction

*Aedes aegypti* mosquitoes transmit some of the most important arboviral diseases worldwide. They are widespread in tropical and subtropical regions (1), inhabiting urban environments where they have adapted to breed in artificial containers (2). Dengue and Zika are among the viruses they transmit and these are rapidly increasing their burden on global health. Dengue alone infects as many as 390 million people each year, and up to half of the world's population is at risk of infection (1). Zika is an emerging threat that is experiencing an epidemic following an outbreak in Brazil in 2015 (3, 4). Efforts to reduce the spread of dengue and Zika rely on direct control of *Ae. aegypti* populations because there are no commercially available vaccines (5). Though permanent mosquito eradication is unlikely to be achieved, several genetic and biological approaches are being utilized to reduce the burden of arboviruses (6).

One such approach involves the release of *Aedes aegypti* infected with the bacterium *Wolbachia* into wild populations of mosquitoes in an effort to combat dengue and Zika (7, 8). *Wolbachia* are transmitted maternally and often manipulate the reproduction of their hosts to enhance their own transmission (9). These bacteria are of particular interest in the control of arboviral diseases as they are known to inhibit the replication of RNA viruses in insects (10). Infections of *Wolbachia* from *Drosophila melanogaster* and *Ae. albopictus* were recently introduced experimentally into *Ae. aegypti* and were found to suppress the transmission of dengue (11, 12), Zika (13, 14), chikungunya (11, 15), yellow fever (15) and West Nile viruses (16). This innate viral suppression makes *Wolbachia* a desirable alternative for arboviral control as it removes the need for mosquito eradication.

More than four *Wolbachia* infections have now been established in *Ae. aegypti* from interspecific transfers, including the wMelPop (17) and wMel (18) infections from *D. melanogaster*, the wAlbB infection from *Ae. albopictus* (19), and a wMel/wAlbB superinfection (20). These *Wolbachia* infections induce cytoplasmic incompatibility in *Ae. aegypti*, a phenomenon that results in sterility when an infected male mates with an uninfected female. *Wolbachia*-infected females therefore possess a reproductive advantage because they can produce viable offspring with both infected and uninfected males as mates (21). These infections vary considerably in their effects on the mosquito host, from the minor deleterious fitness effects of wMel (22-24) to the severe longevity and fertility costs of wMelPop (25-27). Variability also exists in the extent to which they suppress arboviruses; infections that reach a higher density in the host tend to block viruses more effectively (12, 18, 20).

With its lack of severe fitness effects and its ability to cause cytoplasmic incompatibility, the wMel infection is suitable for invading naïve mosquito populations (18). This infection has become established in multiple wild populations of mosquitoes in Queensland, Australia (7), and persists in these populations years after the associated releases ceased (22). wMel is currently the favored infection for *Wolbachia* interventions on an international scale and is undergoing field release trials in

Brazil, Indonesia, Vietnam and Colombia (8, 28). Cage and field trials of the *w*MelPop infection demonstrate its difficulty in invading and persisting (18, 29), though the infection could have utility in population suppression programs (30, 31) due to its detrimental effect on quiescent egg viability (25, 26). The *w*AlbB infection is yet to be released in the field but it has successfully invaded caged populations in the laboratory (19, 23).

Since *Wolbachia* were introduced into *Ae. aegypti*, the four described infections have each displayed complete cytoplasmic incompatibility and maternal inheritance in the laboratory (17-20). A high fidelity of these traits is necessary for the success of *Wolbachia* as a biological control; maternal transmission leakage and partial cytoplasmic incompatibility will increase the proportion of infected mosquitoes needed for the infection to spread, reduce the speed of invasion and prevent the infection from reaching fixation in a population (32). Some natural *Wolbachia* infections in *Drosophila* exhibit perfect maternal inheritance and complete cytoplasmic incompatibility in the laboratory, but display incomplete fidelity under field conditions (33, 34).

The effects of *Wolbachia* on reproduction can depend on the density of *Wolbachia* in mosquito cells. In insects other than *Ae. aegypti*, a decline in *Wolbachia* density can reduce the degree of male-killing (35), feminization (36), parthenogenesis (37) and cytoplasmic incompatibility (38, 39). Incomplete cytoplasmic incompatibility occurs when some sperm cysts in the testes are not infected with *Wolbachia* (40, 41). To ensure the transmission of *Wolbachia* to all offspring, densities must exceed a threshold in the ovaries (42). Viral protection by *Wolbachia* is also density dependent, with higher densities in the host generally resulting in greater protection (43, 44). However, environmental conditions such as temperature (45, 46), nutrition (47, 48) and pathogen infection (49, 50) are known to modulate *Wolbachia* densities in other insects. Given the importance of bacterial density in determining *Wolbachia*'s reproductive effects (cytoplasmic incompatibility and maternal transmission fidelity), fitness costs and viral blocking effects, work is needed to determine if environmental effects play a role in modulating densities in experimental infections of *Ae. aegypti*.

*Ae. aegypti* larvae often experience large diurnal fluctuations of temperature in nature, particularly in small containers of water and in habitats exposed to direct sunlight (51, 52). While the thermal limits of *Ae. aegypti* are generally well understood (53-55), research has not assessed *Wolbachia*'s reproductive effects in *Ae. aegypti* at the high temperatures they can experience in the field. Ulrich and others (56) recently demonstrated that the density of *w*Mel in *Ae. aegypti* decreased sharply when larvae experienced diurnally cycling temperatures of 28.5°C to 37.5°C during development. This suggests that the reproductive effects of *Wolbachia* could also be altered if infected larvae develop under similar conditions in the field.

We explored the hypothesis that the reproductive effects of *Wolbachia* infections could be diminished if *Ae. aegypti* experience stressful, high thermal maxima within a large diurnal cyclical temperature regime during development. We tested three *Wolbachia* infections: *wMel*, *wMelPop* and *wAlbB*, for their maternal transmission fidelity and ability to cause cytoplasmic incompatibility. We show for the first time that cyclical temperatures reaching a maximum of 37°C reduce the expression of cytoplasmic incompatibility in the *wMel* and *wMelPop* infections of *Ae. aegypti*. We also find a greatly diminished *Wolbachia* density under these conditions. Exposing *wMel* and *wMelPop*-infected mosquitoes to this regime over two generations cures *Wolbachia* entirely. Conversely, the *wAlbB* infection is more stable in terms of its reproductive effects and density under cyclical temperatures. These findings suggest the need for multiple infection types suitable for different conditions when using *Wolbachia* infections in biological control strategies.

## Results

### Maximum daily temperatures of 37°C during development reduce the hatch rate of *wMel*-infected eggs

We compared the hatch rate of eggs from crosses between *Wolbachia*-infected *Ae. aegypti* females and *Wolbachia*-infected males reared under cyclical temperatures. Larvae of both sexes were reared in incubators set to cycle diurnally between a minimum of 26°C and a maximum of either 26°C, 32°C, 34.5°C or 37°C (Figure S1), and crosses were then conducted at 26°C. We observed a sharp decrease in the hatch rate of eggs when *wMel*-infected mosquitoes were reared at 26-37°C compared to 26°C (Mann-Whitney U:  $Z = 2.802$ ,  $P = 0.005$ ), but found no effect of rearing temperature on hatch rate for the *wAlbB* (Kruskal-Wallis  $\chi^2 = 2.587$ ,  $df = 3$ ,  $P = 0.460$ ) or *wMelPop* ( $\chi^2 = 1.687$ ,  $df = 3$ ,  $P = 0.640$ ) infections (Figure 1). We hypothesized that reduced hatch rate in *wMel*-infected mosquitoes could reflect the loss of *Wolbachia* infection under heat stress, leading to partial cytoplasmic incompatibility.

### *Wolbachia* density is reduced in *wMel* and *wMelPop*, but not *wAlbB*-infected adults reared under cyclical temperatures of 26-37°C

We wanted to see if a reduction in *Wolbachia* density could explain the reduced hatch rate of *wMel*-infected eggs. We measured the density of *Wolbachia* in adults infected with *wMel*, *wAlbB* and *wMelPop* when reared at either 26°C, 26-32°C or 26-37°C. The density of *wMel* did not differ significantly between 26°C and 26-32°C for either males (Mann-Whitney U:  $Z = 1.190$ ,  $P = 0.234$ ) or

females ( $Z = 1.112$ ,  $P = 0.267$ ), but sharply decreased at 26-37°C in both sexes (Figure 2). The density in females reared at 26°C (mean  $\pm$  SD =  $3.56 \pm 1.87$ ,  $n = 29$ ) was 14.75-fold higher than those reared at 26-37°C ( $0.24 \pm 1.04$ ,  $n = 30$ ,  $Z = 6.239$ ,  $P < 0.0001$ ). For males the difference between 26°C ( $4.65 \pm 2.71$ ,  $n = 29$ ) and 26-37°C ( $0.027 \pm 0.025$ ,  $n = 30$ ) was 174.73-fold ( $Z = 6.688$ ,  $P < 0.0001$ ). For *wMelPop*, female *Wolbachia* density at 26°C (mean  $\pm$  SD =  $84.60 \pm 89.19$ ,  $n = 30$ ) was 268.34-fold higher than those reared at 26-37°C ( $0.32 \pm 0.66$ ,  $n = 30$ ,  $Z = 6.631$ ,  $P < 0.0001$ ), while males reared at 26°C ( $45.62 \pm 32.25$ ,  $n = 30$ ) had a 73.37-fold higher density than males reared at 26-37°C ( $0.62 \pm 1.76$ ,  $n = 30$ ,  $Z = 6.542$ ,  $P < 0.0001$ ). In contrast, there was no significant difference in *wAlbB* density between 26°C and 26-37°C for both females ( $Z = 0.47$ ,  $P = 0.638$ ) and males ( $Z = 1.678$ ,  $P = 0.093$ ). However, there was a significant effect of temperature overall due to an increased density at 32°C in both females (Kruskal-Wallis  $\chi^2 = 7.826$ ,  $df = 2$ ,  $P = 0.020$ ) and males ( $\chi^2 = 16.311$ ,  $df = 2$ ,  $P = 0.0003$ ).

### **Cytoplasmic incompatibility is partially lost in *wMel* and *wMelPop*, but not *wAlbB*-infected adults reared under cyclical temperatures of 26-37°C**

Crosses between uninfected female and *Wolbachia*-infected male *Ae. aegypti* produce no viable offspring under standard laboratory conditions due to cytoplasmic incompatibility (17-19). We hypothesized that reduced *Wolbachia* densities in infected males reared at 26-37°C would coincide with reduced fidelity of cytoplasmic incompatibility. Incomplete cytoplasmic incompatibility leads to some viable progeny when infected males mate with uninfected females (33). We crossed *wMel*, *wAlbB* and *wMelPop* males reared at 26°C and 26-37°C to uninfected females reared at 26°C, and scored the proportion of eggs that hatched (Figure 3A). 245 larvae hatched from 1747 eggs (14.02%) across all replicates when *wMel*-infected males were reared at 26-37°C. Conversely, we observed complete sterility when males were reared at 26°C (Mann-Whitney U:  $Z = 2.802$ ,  $P = 0.005$ ). We also observed incomplete cytoplasmic incompatibility in the *wMelPop* infection; 301 larvae hatched from 1846 eggs (16.31%) when males were reared at 26-37°C, but no larvae hatched when males were reared at 26°C ( $Z = 2.802$ ,  $P = 0.005$ ). In contrast to *wMel* and *wMelPop*, no eggs hatched from uninfected females that were mated to *wAlbB*-infected males reared under either regime ( $Z = 0.080$ ,  $P = 0.936$ ). The cytoplasmic incompatibility induced by *wAlbB* therefore appears to be stable under these conditions.

We also scored the hatch rate of *Wolbachia*-infected females reared under a cycling 26-37°C when crossed to infected males reared at 26°C (Figure 3B). We hypothesized that reduced *Wolbachia* densities in the female could restore cytoplasmic incompatibility in this cross. For the *wMel* infection, mean hatch rates were drastically reduced to 22.7% in infected females reared at 26-37°C compared to 85.7% when reared at 26°C (Mann-Whitney U:  $Z = 2.802$ ,  $P = 0.005$ ). Conversely, we found no

effect on the *wMelPop* ( $Z = 0.400$ ,  $P = 0.689$ ) and *wAlbB* ( $Z = 0.560$ ,  $P = 0.575$ ) infections; females possessed similar hatch rates regardless of the rearing temperature. Taken together, these results show that a cyclical rearing regime reaching a maximum of 37°C reduces both the ability of *wMel*-infected males to induce cytoplasmic incompatibility and the ability of *wMel*-infected females to retain compatibility.

### **The *wMel* and *wMelPop* infections are lost, and *wAlbB* exhibits incomplete maternal transmission fidelity at 26-37°C**

We tested the ability of *wMel*, *wAlbB* and *wMelPop*-infected females to transmit *Wolbachia* to their offspring when their entire lifecycle occurred at either a constant 26°C or a cycling 26-37°C. Females from each infection type were crossed to uninfected males, and their progeny were reared to the 4<sup>th</sup> instar at the same temperature as the mother. *wMel* and *wAlbB*-infected females transmitted the infection to all of their offspring at 26°C. The *wMelPop* infection was also transmitted with a high fidelity at 26°C, though a single *wMelPop*-infected female produced two uninfected progeny (Table 1). In contrast, the *wMel* and *wMelPop* infections were lost completely when mothers and offspring were maintained at 26-37°C; all progeny were conclusively uninfected with *Wolbachia*. The *wAlbB* infection was transmitted to the majority of offspring at 26-37°C, but 11.5% lost the infection (Table 1).

### **Discussion**

We demonstrate for the first time that the *wMel* and *wMelPop* infections of *Ae. aegypti* exhibit reduced cytoplasmic incompatibility when immature stages experience cyclical temperatures of 26-37°C during development, in contrast to the *wAlbB* infection. We also show that these infections are lost completely when infected mosquitoes experience these conditions over their entire lifecycle. *wMel* infected mosquitoes are currently being deployed in several countries for the control of arboviruses (28). Immature *Ae. aegypti* may experience extreme temperatures in the field (31, 52), and the thermal sensitivity of the *wMel* and *wMelPop* infections could therefore reduce their ability to establish and persist in natural populations. The *wAlbB* infection retains its ability to induce complete cytoplasmic incompatibility under the same conditions, while maternal transmission fidelity remains relatively high. Densities of *wAlbB* are also stable, suggesting that it will also provide effective arboviral protection (20, 57). The robustness of *wAlbB* when exposed to high maximum temperatures could make this infection more suited for field release in environments where temperatures in breeding sites fluctuate in comparison to *wMel*.

High temperatures have been known for some time to have a negative effect on *Wolbachia*. In other arthropods, high temperatures can reduce the density of *Wolbachia* in its host (45, 58-60), weaken the reproductive effects induced by *Wolbachia* (38, 61-65) and even eliminate *Wolbachia* entirely (61, 62, 66-68). Only recently have the effects of temperature been characterised in experimental *Wolbachia* infections of *Ae. aegypti*. Ye and others (69) reared wMel-infected larvae under diurnally cycling temperatures and assessed their vector competence and *Wolbachia* density. They concluded that the wMel infection should remain robust in terms of its ability to reduce dengue transmission under field conditions in Cairns, Australia. However, the authors only tested temperatures reaching a maximum of 32°C; we observed no effect on *Wolbachia* density or hatch rate under similar conditions. In nature, larvae and pupae are restricted to aquatic environments where average maximum temperatures can reach 37°C during the wet season in Cairns (52). Here we employed a larger temperature range to better reflect natural conditions in the field. Although we did not test vectorial capacity directly, we observed a greatly reduced density of wMel in adults when larvae experienced a maximum temperature of 37°C. These conditions will likely affect the viral suppression induced by wMel as the ability of *Wolbachia* to interfere with transmission relies on high densities in relevant tissues (43, 70).

In the majority of our experiments we exposed larvae to cyclical temperatures while maintaining adults and eggs at 26°C. However, we observed that when all life stages were maintained at 26-37°C for almost two generations, the wMel and wMelPop infections were eliminated. The wAlbB infection also exhibited some maternal transmission leakage despite maintaining high densities and complete cytoplasmic incompatibility when only larvae were exposed. This suggests that both the duration of exposure and the maximum temperature reached will affect *Wolbachia* density. Ulrich and others (56) provide additional evidence that the timing of heat stress is important; lowest wMel densities corresponded with the longest stress duration in immature *Ae. aegypti*, and densities varied considerably depending on their developmental stage at the time of exposure. More work is needed in these areas particularly as conditions and responses in the field are likely to be diverse.

We find that the wMel and wMelPop infections differ markedly from wAlbB in their response to heat stress; to our knowledge this is the first comparison of high temperature responses between multiple *Wolbachia* infections. Differences in heat tolerance could result from different evolutionary histories; wMel and wMelPop are nearly genetically identical (71, 72) and originate from the same host, *D. melanogaster* (73, 74). wAlbB occurs naturally in *Ae. albopictus*, a mosquito native to south-east Asia (75, 76); this infection may have evolved a relatively higher heat tolerance in response to the temperatures experienced by *Ae. albopictus* in its historical distribution. wAlbB density decreases only slightly when naturally infected *Ae. albopictus* are reared at a constant 37°C (45, 77). The effects of high temperatures on the density of wMel and wMelPop in their natural host are however unknown.



Whether there is an influence of the host on *Wolbachia*'s thermal tolerance requires further investigation.

The differential responses of *Wolbachia* infection types under heat stress may arise from factors other than their ability to tolerate high temperatures. *Wolbachia* densities can be influenced by interactions with WO, temperate bacteriophage which infect *Wolbachia* (78). Temperate phage undergo lysogenic and lytic cycles, the latter of which can be induced by heat shock (59, 79). During the lytic cycle, phage replicate and infect new *Wolbachia* cells, potentially reducing densities of *Wolbachia* through cell lysis (80). High densities of lytic phage reduce the density of *Wolbachia* and the strength of cytoplasmic incompatibility in the parasitoid wasp *Nasonia vitripennis* (81). Therefore, high temperatures may reduce *Wolbachia* densities in *Ae. aegypti* through the same mechanism. WO phage infect wMel (82) and wAlbB (50, 83) in their native hosts, but it is unknown if they persist following transfer to *Ae. aegypti*, though WO phage can be maintained upon interspecific transfer of *Wolbachia* in moths (84). This too requires further investigation.

While the mechanism for the loss of *Wolbachia* at high temperatures is unknown, our results strongly suggest that the ability of wMel and wMelPop-infected *Ae. aegypti* to invade and persist in natural populations will be adversely affected by heat. We observed reduced cytoplasmic incompatibility and maternal transmission fidelity at cyclical temperatures approximating breeding containers in the field; constant high temperatures are therefore not needed to have adverse effects on *Wolbachia*. Incomplete cytoplasmic incompatibility and/or maternal transmission fidelity of *Wolbachia* will reduce the speed of invasion, increase the minimum infection threshold required for invasion to take place and decrease the maximum frequency that can be reached in a population (32). Maximum daily temperatures of larval mosquito habitats in nature can reach or exceed the maximum temperature tested in this study (52, 85, 86) and this should be a careful consideration for additional research in this area. Though *Wolbachia* densities may partially recover if adults can avoid extreme temperatures (56), the loss of cytoplasmic incompatibility can still occur even when adults are returned to low temperatures for several days before mating, as we demonstrate here. These findings could help explain the lack of invasiveness by the wMel infection in some tropical locations where upper extremes are common (28). Mosquito suppression strategies which use *Wolbachia*-infected males as a sterile insect may also be impacted by temperature but this work suggests males reared in the laboratory at lower temperatures are more likely to succeed.

As releases of *Ae. aegypti* infected with wMel are currently underway in several countries, researchers should assess the impact of heat stress on *Wolbachia* infections in the field. Our findings emphasize the need for further characterization of current *Wolbachia* infections under a range of temperature conditions, particularly in terms of the duration of exposure to extreme temperatures and the effects across generations. An enormous diversity of *Wolbachia* strains exist in nature (87); alternative strains,

or current infections selected for increased thermal tolerance, should be considered. Our results also highlight the importance of temperature control in the laboratory rearing of *Wolbachia*-infected insects. Heat stress could be used to cure the *wMel* and *wMelPop* infections from mosquitoes in order to study their effects (68) as an alternative to tetracycline (88). A better understanding of the response of *Wolbachia* infections to varying environmental conditions is required particularly in the context of laboratory rearing and in their application as an arboviral biocontrol agent in the field.

## Methods

### Colony maintenance and *Wolbachia* infections

Uninfected *Aedes aegypti* mosquitoes were collected from Townsville, Queensland, in November 2015 and maintained in a temperature controlled insectary at  $26^{\circ}\text{C} \pm 1^{\circ}\text{C}$  according to methods described by Axford and others (23). *Aedes aegypti* with the *wMel*, *wMelPop* and *wAlbB* infections of *Wolbachia* were derived from lines transinfected previously (17-19). Females from all *Wolbachia*-infected lines were crossed to males from the Townsville line for three generations in succession to control for genetic background. Female mosquitoes were blood fed on the forearms of human volunteers. Blood feeding on human subjects was approved by the University of Melbourne Human Ethics Committee (approval 0723847). All volunteers provided informed written consent.

### Rearing at cyclical temperatures

Larvae for all experiments were reared in incubators (PG50 Plant Growth Chambers, Labec Laboratory Equipment, Marrickville, NSW, Australia) set to a constant  $26^{\circ}\text{C}$  or to one of the following cyclical temperatures:  $26\text{-}32^{\circ}\text{C}$ ,  $26\text{-}34.5^{\circ}\text{C}$  and  $26\text{-}37^{\circ}\text{C}$  at a 12:12 light: dark photoperiod. Cycling incubators were set to maintain  $26^{\circ}\text{C}$  during the dark period and the maximum temperature during light, with 12 hours at each temperature. Water temperatures were monitored by placing data loggers (Thermochron; 1-Wire, iButton.com, Dallas Semiconductors, Sunnyvale, CA, USA) in sealed glass vials, which were submerged in plastic trays ( $11.5 \times 16.5 \times 5.5$  cm) filled with 500 mL of water identical to larval rearing trays. Temperature was measured at 30 minute intervals. Representative daily temperature fluctuations that occurred in each incubator for the duration of the experiments are shown in Figure S1. Rearing at cyclical temperatures of  $26\text{-}32^{\circ}\text{C}$  or  $26\text{-}37^{\circ}\text{C}$  decreased the wing length of adults (Figure S2), suggesting they were heat stressed.

For each experiment, eggs from the uninfected, *wMel*, *wMelPop* and *wAlbB* lines were hatched synchronously in 3 L trays of RO water at  $26^{\circ}\text{C}$ . Hatching trays were transferred to incubators within

two hours of hatching. Larvae were provided TetraMin® tropical fish food tablets (Tetra, Melle, Germany) *ad libitum* and maintained at a controlled density of 100 larvae in 500 mL water. Temperatures in each incubator deviated by up to  $\pm 0.5^{\circ}\text{C}$  from the set-point, depending on the location of data loggers. We randomised the position of rearing trays within incubators and frequently moved them to different positions to account for positional effects.

### **Hatch rate and cytoplasmic incompatibility**

Crosses between *Wolbachia* infection types were conducted to determine the proportion of viable offspring from parents reared at different cyclical temperatures. Pupae were sexed according to size (females are larger than males) and added to 12 L cages held at  $26^{\circ}\text{C} \pm 1^{\circ}\text{C}$  within 24 hours of eclosion after confirming their sex. Sexes, infection types and adults reared at each temperature were maintained in separate cages. Adults were allowed to mature and acclimatise to  $26^{\circ}\text{C}$  for at least 48 hours; crosses were conducted only when all adults were at least 48 hours old as development times varied between sexes and rearing temperatures. After the period of maturation, 7 males and 7 females from their respective infection type were aspirated into 1.5 L cages and allowed to mate for 3 days. Each cross was comprised of 6 replicate cages; the combinations of sex, rearing temperature and *Wolbachia* infection status for each cross are described in the results section. Each cage was provided with water for the duration of the experiment, and sugar until 24 h prior to blood feeding. Females were provided a blood meal through mesh on the side of each cage until all females had fed to repletion. Multiple human volunteers were used, with one volunteer per replicate cage. Pill cups were filled with 25 mL of water and lined with filter paper (Whatman® 90mm qualitative circles, GE Healthcare Australia Pty. Ltd., Parramatta, New South Wales, Australia) and provided as an oviposition substrate. Eggs laid on filter papers were collected daily, dried on paper towel and photographed with a digital camera. The number of eggs laid was determined with a clicker counter. Eggs were hatched in containers of 200 mL of water four days after collection, and larvae were reared to the 3<sup>rd</sup> instar. Hatch proportions were defined as the number of larvae counted, including larvae that hatched precociously (visible on the filter papers).

### ***Wolbachia* quantification**

The density of *Wolbachia* in adults reared at cyclical temperatures was determined for the *w*Mel, *w*MelPop and *w*AlbB infections. We reared three trays of 100 larvae per infection type at  $26^{\circ}\text{C}$ ,  $26-32^{\circ}\text{C}$  and  $26-37^{\circ}\text{C}$  (see “Rearing at cyclical temperatures”). Eclosing adults were collected daily at noon and stored in absolute ethanol for DNA extraction. We selected 10 males and 10 females at random per tray for *Wolbachia* quantification. DNA extraction and *Wolbachia* quantification were

conducted according to methods described previously (22, 23, 89). DNA from adults with both wings removed was extracted using 150  $\mu$ L of 5% Chelex<sup>®</sup> 100 resin (Bio-Rad Laboratories, Hercules, CA). We used a LightCycler 480 system (Roche Applied Science, Indianapolis, IN) to amplify *Ae. aegypti*-specific (*aRpS6*) and *Wolbachia*-specific (*wMel*, *wAlbB* or *wMelPop*) genes. Three technical replicates of the *aRpS6* and *Wolbachia*-specific markers were completed for each mosquito; differences in crossing point between the two markers were averaged to obtain an estimate of *Wolbachia* density. These values were then transformed by  $2^n$  to obtain relative *Wolbachia* densities.

### Maternal transmission of *Wolbachia*

We tested the ability of *wMel*, *wMelPop* and *wAlbB*-infected females to transmit *Wolbachia* infections to their offspring. *Wolbachia*-infected females were reared from the egg stage in incubators set to a constant 26°C or a cycling 26-37°C (see “Rearing at cyclical temperatures”) and crossed to uninfected males. Females were blood-fed *en masse* and isolated in 70mL plastic cups filled with 20mL of water and lined with a 2  $\times$  12 cm strip of sandpaper (Norton<sup>®</sup> Master Painters P80 sandpaper, Saint-Gobain Abrasives Pty. Ltd., Thomastown, Victoria, Australia). Eggs from each female were hatched by adding an additional 10 mL of water to the plastic cup in order to submerge the eggs. TetraMin<sup>®</sup> was provided *ad libitum*. Progeny were reared to 3<sup>rd</sup> or 4<sup>th</sup> instar, stored in ethanol, then tested for the presence and density of *Wolbachia* (see “*Wolbachia* quantification”). We scored 10 offspring from 8 females per infection type at each temperature. Note that mothers and offspring were maintained in their respective incubators (26°C or 26-37°C) for the entire duration of the experiment, including egg and adult stages.

### Statistical analyses

All analyses were conducted using SPSS statistics version 21.0 for Windows (SPSS Inc, Chicago, IL). Hatch proportions and *Wolbachia* densities were not normally distributed according to Shapiro-Wilk tests, therefore we analyzed all data with nonparametric Kruskal-Wallis and Mann-Whitney U tests.

### Acknowledgements

We thank Elizabeth Valerie, Shani Wong, Michael Ørsted, Ashley Callahan and Ellen Cottingham for providing technical assistance with experiments. We thank Chris Paton and Scott Ritchie for providing field-collected mosquito eggs. We also thank Peter Kriesner and Gordana Rašić for valuable discussions.

## References

1. Bhatt S, *et al.* (2013) The global distribution and burden of dengue. *Nature* 496(7446):504-507.
2. Cheong W (1967) Preferred *Aedes aegypti* larval habitats in urban areas. *Bull World Health Organ* 36(4):586-589.
3. Hennessey M, Fischer M, & Staples JE (2016) Zika virus spreads to new areas—region of the Americas, May 2015–January 2016. *Am J Transplant* 16(3):1031-1034.
4. Kindhauser MK, Allen T, Frank V, Santhana RS, & Dye C (2016) Zika: the origin and spread of a mosquito-borne virus. *Bull World Health Organ* 94(3):158.
5. Hadinegoro SR, *et al.* (2015) Efficacy and Long-Term Safety of a Dengue Vaccine in Regions of Endemic Disease. *N Engl J Med* 373(13):1195-1206.
6. McGraw EA & O'Neill SL (2013) Beyond insecticides: new thinking on an ancient problem. *Nature reviews. Microbiology* 11(3):181-193.
7. Hoffmann AA, *et al.* (2011) Successful establishment of *Wolbachia* in *Aedes* populations to suppress dengue transmission. *Nature* 476(7361):454-457.
8. Garcia Gde A, Dos Santos LM, Villela DA, & Maciel-de-Freitas R (2016) Using *Wolbachia* Releases to Estimate *Aedes aegypti* (Diptera: Culicidae) Population Size and Survival. *PloS one* 11(8):e0160196.
9. Werren JH, Baldo L, & Clark ME (2008) *Wolbachia*: master manipulators of invertebrate biology. *Nature reviews. Microbiology* 6(10):741-751.
10. Hedges LM, Brownlie JC, O'Neill SL, & Johnson KN (2008) *Wolbachia* and virus protection in insects. *Science* 322(5902):702-702.
11. Moreira LA, *et al.* (2009) A *Wolbachia* symbiont in *Aedes aegypti* limits infection with dengue, Chikungunya, and Plasmodium. *Cell* 139(7):1268-1278.
12. Ferguson NM, *et al.* (2015) Modeling the impact on virus transmission of *Wolbachia*-mediated blocking of dengue virus infection of *Aedes aegypti*. *Sci Transl Med* 7(279):279ra237.
13. Dutra HL, *et al.* (2016) *Wolbachia* Blocks Currently Circulating Zika Virus Isolates in Brazilian *Aedes aegypti* Mosquitoes. *Cell host & microbe* 19(6):771-774.
14. Aliota MT, Peinado SA, Velez ID, & Osorio JE (2016) The wMel strain of *Wolbachia* Reduces Transmission of Zika virus by *Aedes aegypti*. *Scientific reports* 6:28792.
15. van den Hurk AF, *et al.* (2012) Impact of *Wolbachia* on infection with chikungunya and yellow fever viruses in the mosquito vector *Aedes aegypti*. *PLoS neglected tropical diseases* 6(11):e1892.
16. Hussain M, *et al.* (2013) Effect of *Wolbachia* on replication of West Nile virus in a mosquito cell line and adult mosquitoes. *Journal of virology* 87(2):851-858.
17. McMeniman CJ, *et al.* (2009) Stable introduction of a life-shortening *Wolbachia* infection into the mosquito *Aedes aegypti*. *Science* 323(5910):141-144.
18. Walker T, *et al.* (2011) The wMel *Wolbachia* strain blocks dengue and invades caged *Aedes aegypti* populations. *Nature* 476(7361):450-453.
19. Xi Z, Khoo CC, & Dobson SL (2005) *Wolbachia* establishment and invasion in an *Aedes aegypti* laboratory population. *Science* 310(5746):326-328.
20. Joubert DA, *et al.* (2016) Establishment of a *Wolbachia* Superinfection in *Aedes aegypti* Mosquitoes as a Potential Approach for Future Resistance Management. *PLoS pathogens* 12(2):e1005434.
21. Tram U, Ferree PM, & Sullivan W (2003) Identification of *Wolbachia*–host interacting factors through cytological analysis. *Microb Infect* 5(11):999-1011.
22. Hoffmann AA, *et al.* (2014) Stability of the wMel *Wolbachia* infection following invasion into *Aedes aegypti* populations. *PLoS neglected tropical diseases* 8(9):e3115.
23. Axford JK, Ross PA, Yeap HL, Callahan AG, & Hoffmann AA (2016) Fitness of wAlbB *Wolbachia* Infection in *Aedes aegypti*: Parameter Estimates in an Outcrossed Background and Potential for Population Invasion. *The American journal of tropical medicine and hygiene* 94(3):507-516.

24. Ross PA, Endersby NM, Yeap HL, & Hoffmann AA (2014) Larval competition extends developmental time and decreases adult size of wMelPop *Wolbachia*-infected *Aedes aegypti*. *The American journal of tropical medicine and hygiene* 91(1):198-205.
25. McMeniman CJ & O'Neill SL (2010) A virulent *Wolbachia* infection decreases the viability of the dengue vector *Aedes aegypti* during periods of embryonic quiescence. *PLoS neglected tropical diseases* 4(7):e748.
26. Yeap HL, *et al.* (2011) Dynamics of the "popcorn" *Wolbachia* infection in outbred *Aedes aegypti* informs prospects for mosquito vector control. *Genetics* 187(2):583-595.
27. Ross PA, Endersby NM, & Hoffmann AA (2016) Costs of Three *Wolbachia* Infections on the Survival of *Aedes aegypti* Larvae under Starvation Conditions. *PLoS neglected tropical diseases* 10(1):e0004320.
28. (2016) (Eliminate Dengue - Progress. Available at <http://www.eliminatedengue.com/progress> [Accessed August 30, 2016].
29. Nguyen TH, *et al.* (2015) Field evaluation of the establishment potential of wMelPop *Wolbachia* in Australia and Vietnam for dengue control. *Parasites & vectors*:In press.
30. Rašić G, Endersby NM, Williams C, & Hoffmann AA (2014) Using *Wolbachia*-based release for suppression of *Aedes* mosquitoes: insights from genetic data and population simulations. *Ecol Appl* 24(5):1226-1234.
31. Ritchie SA, Townsend M, Paton CJ, Callahan AG, & Hoffmann AA (2015) Application of wMelPop *Wolbachia* strain to crash local populations of *Aedes aegypti*. *PLoS neglected tropical diseases* 9(7):e0003930.
32. Turelli M & Hoffmann A (1999) Microbe-induced cytoplasmic incompatibility as a mechanism for introducing transgenes into arthropod populations. *Insect molecular biology* 8(2):243-255.
33. Hoffmann AA, Turelli M, & Harshman LG (1990) Factors affecting the distribution of cytoplasmic incompatibility in *Drosophila simulans*. *Genetics* 126(4):933-948.
34. Turelli M (1994) Evolution of incompatibility-inducing microbes and their hosts. *Evolution; international journal of organic evolution* 48(5):1500-1513.
35. Dyer KA, Minhas MS, & Jaenike J (2005) Expression and modulation of embryonic male-killing in *Drosophila innubila*: opportunities for multilevel selection. *Evolution; international journal of organic evolution* 59(4):838-848.
36. Rigaud T, Pennings PS, & Juchault P (2001) *Wolbachia* bacteria effects after experimental interspecific transfers in terrestrial isopods. *J Invertebr Pathol* 77(4):251-257.
37. Zchori-Fein E, Gottlieb Y, & Coll M (2000) *Wolbachia* density and host fitness components in *Muscidifurax uniraptor* (Hymenoptera: pteromalidae). *J Invertebr Pathol* 75(4):267-272.
38. Clancy DJ & Hoffmann AA (1998) Environmental effects on cytoplasmic incompatibility and bacterial load in *Wolbachia*-infected *Drosophila simulans*. *Entomol Exp Appl* 86(1):13-24.
39. Ikeda T, Ishikawa H, & Sasaki T (2003) Infection density of *Wolbachia* and level of cytoplasmic incompatibility in the Mediterranean flour moth, *Ephestia kuehniella*. *J Invertebr Pathol* 84(1):1-5.
40. Bourtzis K, Nirgianaki A, Markakis G, & Savakis C (1996) *Wolbachia* infection and cytoplasmic incompatibility in *Drosophila* species. *Genetics* 144(3):1063-1073.
41. Veneti Z, *et al.* (2003) Cytoplasmic incompatibility and sperm cyst infection in different *Drosophila-Wolbachia* associations. *Genetics* 164(2):545-552.
42. McGraw EA, Merritt DJ, Droller JN, & O'Neill SL (2002) *Wolbachia* density and virulence attenuation after transfer into a novel host. *Proc Natl Acad Sci USA* 99(5):2918-2923.
43. Osborne SE, Iturbe-Ormaetxe I, Brownlie JC, O'Neill SL, & Johnson KN (2012) Antiviral protection and the importance of *Wolbachia* density and tissue tropism in *Drosophila simulans*. *Applied and environmental microbiology* 78(19):6922-6929.
44. Martinez J, *et al.* (2014) Symbionts commonly provide broad spectrum resistance to viruses in insects: a comparative analysis of *Wolbachia* strains. *PLoS pathogens* 10(9):e1004369.
45. Wiwatanaratnabutr I & Kittayapong P (2009) Effects of crowding and temperature on *Wolbachia* infection density among life cycle stages of *Aedes albopictus*. *J Invertebr Pathol* 102(3):220-224.



46. Murdock CC, Blanford S, Hughes GL, Rasgon JL, & Thomas MB (2014) Temperature alters *Plasmodium* blocking by *Wolbachia*. *Scientific reports* 4:3932.
47. Dutton TJ & Sinkins SP (2004) Strain-specific quantification of *Wolbachia* density in *Aedes albopictus* and effects of larval rearing conditions. *Insect molecular biology* 13(3):317-322.
48. Correa CC & Ballard JW (2014) What can symbiont titres tell us about co-evolution of *Wolbachia* and their host? *J Invertebr Pathol* 118:20-27.
49. Mousson L, et al. (2010) *Wolbachia* modulates Chikungunya replication in *Aedes albopictus*. *Molecular ecology* 19(9):1953-1964.
50. Tortosa P, Courtiol A, Moutailler S, Failloux AB, & Weill M (2008) Chikungunya-*Wolbachia* interplay in *Aedes albopictus*. *Insect molecular biology* 17(6):677-684.
51. Kearney M, Porter WP, Williams C, Ritchie S, & Hoffmann AA (2009) Integrating biophysical models and evolutionary theory to predict climatic impacts on species' ranges: the dengue mosquito *Aedes aegypti* in Australia. *Funct Ecol* 23(3):528-538.
52. Richardson KM, Hoffmann AA, Johnson P, Ritchie SR, & Kearney MR (2013) A replicated comparison of breeding-container suitability for the dengue vector *Aedes aegypti* in tropical and temperate Australia. *Austral Ecol* 38(2):219-229.
53. Mohammed A & Chadee DD (2011) Effects of different temperature regimens on the development of *Aedes aegypti* (L.) (Diptera: Culicidae) mosquitoes. *Acta tropica* 119(1):38-43.
54. Richardson K, Hoffmann AA, Johnson P, Ritchie S, & Kearney MR (2011) Thermal Sensitivity of *Aedes aegypti* From Australia: Empirical Data and Prediction of Effects on Distribution. *J Med Ent* 48(4):914-923.
55. Carrington LB, Armijos MV, Lambrechts L, Barker CM, & Scott TW (2013) Effects of fluctuating daily temperatures at critical thermal extremes on *Aedes aegypti* life-history traits. *PloS one* 8(3):e58824.
56. Ulrich JN, Beier JC, Devine GJ, & Hugo LE (2016) Heat Sensitivity of wMel *Wolbachia* during *Aedes aegypti* Development. *PLoS neglected tropical diseases* 10(7):e0004873.
57. Bian G, Xu Y, Lu P, Xie Y, & Xi Z (2010) The endosymbiotic bacterium *Wolbachia* induces resistance to dengue virus in *Aedes aegypti*. *PLoS pathogens* 6(4):e1000833.
58. Jeyaparakash A & Hoy MA (2010) Real-Time PCR Reveals Endosymbiont Titer Fluctuations in *Metataseius occidentalis* (Acari: Phytoseiidae) Colonies Held at Different Temperatures. *Fla Entomol* 93(3):464-466.
59. Bordenstein SR & Bordenstein SR (2011) Temperature affects the tripartite interactions between bacteriophage WO, *Wolbachia*, and cytoplasmic incompatibility. *PloS one* 6(12):e29106.
60. Sugimoto TN, Kayukawa T, Matsuo T, Tsuchida T, & Ishikawa Y (2015) A short, high-temperature treatment of host larvae to analyze *Wolbachia*-host interactions in the moth *Ostrinia scapularis*. *Journal of insect physiology* 81:48-51.
61. Trpis M, Perrone J, Reissig M, & Parker K (1981) Control of cytoplasmic incompatibility in the *Aedes scutellaris* complex Incompatible crosses become compatible by treatment of larvae with heat or antibiotics. *The Journal of heredity* 72(5):313-317.
62. Stouthamer R, Luck RF, & Hamilton W (1990) Antibiotics cause parthenogenetic *Trichogramma* (Hymenoptera/Trichogrammatidae) to revert to sex. *Proc Natl Acad Sci USA* 87(7):2424-2427.
63. Johanowicz DL & Hoy MA (1998) Experimental induction and termination of non-reciprocal reproductive incompatibilities in a parahaploid mite. *Entomol Exp Appl* 87(1):51-58.
64. Feder ME, Karr TL, Yang W, Hoekstra JM, & James AC (1999) Interaction of *Drosophila* and its endosymbiont *Wolbachia*: natural heat shock and the overcoming of sexual incompatibility. *Amer Zool* 39(2):363-373.
65. Hurst GD, Johnson AP, vd Schulenburg JHG, & Fuyama Y (2000) Male-killing *Wolbachia* in *Drosophila*: a temperature-sensitive trait with a threshold bacterial density. *Genetics* 156(2):699-709.

66. Stevens L (1989) Environmental factors affecting reproductive incompatibility in flour beetles, genus *Tribolium*. *J Invertebr Pathol* 53(1):78-84.
67. Johanowicz DL & Hoy MA (1996) *Wolbachia* in a predator-prey system: 16S ribosomal DNA analysis of two phytoseiids (Acari: Phytoseiidae) and their prey (Acari: Tetranychidae). *Ann Entomol Soc Am* 89(3):435-441.
68. Van Opijnen T & Breeuwer J (1999) High temperatures eliminate *Wolbachia*, a cytoplasmic incompatibility inducing endosymbiont, from the two-spotted spider mite. *Experimental & applied acarology* 23(11):871-881.
69. Ye YH, Carrasco AM, Dong Y, Sgro CM, & McGraw EA (2016) The Effect of Temperature on *Wolbachia*-Mediated Dengue Virus Blocking in *Aedes aegypti*. *The American journal of tropical medicine and hygiene* 94(4):812-819.
70. Lu P, Bian G, Pan X, & Xi Z (2012) *Wolbachia* induces density-dependent inhibition to dengue virus in mosquito cells. *PLoS neglected tropical diseases* 6(7):e1754.
71. Sun LV, Riegler M, & O'Neill SL (2003) Development of a Physical and Genetic Map of the Virulent *Wolbachia* Strain wMelPop. *Journal of bacteriology* 185(24):7077-7084.
72. Wu M, et al. (2004) Phylogenomics of the reproductive parasite *Wolbachia pipiens* wMel: a streamlined genome overrun by mobile genetic elements. *PLoS biology* 2(3):E69-E69.
73. Hoffmann AA (1988) Partial cytoplasmic incompatibility between two Australian populations of *Drosophila melanogaster*. *Entomol Exp Appl* 48(1):61-67.
74. Min K-T & Benzer S (1997) *Wolbachia*, normally a symbiont of *Drosophila*, can be virulent, causing degeneration and early death. *Proc Natl Acad Sci USA* 94(20):10792-10796.
75. Benedict MQ, Levine RS, Hawley WA, & Lounibos LP (2007) Spread of the tiger: global risk of invasion by the mosquito *Aedes albopictus*. *Vector borne and zoonotic diseases* 7(1):76-85.
76. Wiwatanaratnabutr I & Zhang C (2016) *Wolbachia* infections in mosquitoes and their predators inhabiting rice field communities in Thailand and China. *Acta tropica* 159:153-160.
77. Wiwatanaratnabutr S & Kittayapong P (2006) Effects of temperature and *Wolbachia* load on life history traits of *Aedes albopictus*. *Medical and veterinary entomology* 20(3):300-307.
78. Gavotte L, et al. (2007) A Survey of the bacteriophage WO in the endosymbiotic bacteria *Wolbachia*. *Molecular biology and evolution* 24(2):427-435.
79. Shan J, et al. (2014) Temperature dependent bacteriophages of a tropical bacterial pathogen. *Frontiers in microbiology* 5:599.
80. Kent BN & Bordenstein SR (2010) Phage WO of *Wolbachia*: lambda of the endosymbiont world. *Trends in microbiology* 18(4):173-181.
81. Bordenstein SR, Marshall ML, Fry AJ, Kim U, & Wernegreen JJ (2006) The tripartite associations between bacteriophage, *Wolbachia*, and arthropods. *PLoS pathogens* 2(5):e43.
82. Gavotte L, et al. (2004) Diversity, distribution and specificity of WO phage infection in *Wolbachia* of four insect species. *Insect molecular biology* 13(2):147-153.
83. Chauvatcharin N, Ahanitig A, Baimai V, & Kittayapong P (2006) Bacteriophage WO-B and *Wolbachia* in natural mosquito hosts: infection incidence, transmission mode and relative density. *Molecular ecology* 15(9):2451-2461.
84. Fujii Y, Kubo T, Ishikawa H, & Sasaki T (2004) Isolation and characterization of the bacteriophage WO from *Wolbachia*, an arthropod endosymbiont. *Biochem Biophys Res Commun* 317(4):1183-1188.
85. Paaijmans KP, et al. (2008) Observations and model estimates of diurnal water temperature dynamics in mosquito breeding sites in western Kenya. *Hydrobiol Process* 22(24):4789-4801.
86. Vezzani D & Albicocco A (2009) The effect of shade on the container index and pupal productivity of the mosquitoes *Aedes aegypti* and *Culex pipiens* breeding in artificial containers. *Medical and veterinary entomology* 23(1):78-84.
87. Hoffmann AA, Ross PA, & Rašić G (2015) *Wolbachia* strains for disease control: ecological and evolutionary considerations. *Evol Appl* 8(8):751-768.
88. Dobson SL & Rattanadechakul W (2001) A novel technique for removing *Wolbachia* infections from *Aedes albopictus* (Diptera: Culicidae). *J Med Ent* 38(6):844-849.



89. Lee SF, White VL, Weeks AR, Hoffmann AA, & Endersby NM (2012) High-throughput PCR assays to monitor *Wolbachia* infection in the dengue mosquito (*Aedes aegypti*) and *Drosophila simulans*. *Applied and environmental microbiology* 78(13):4740-4743.

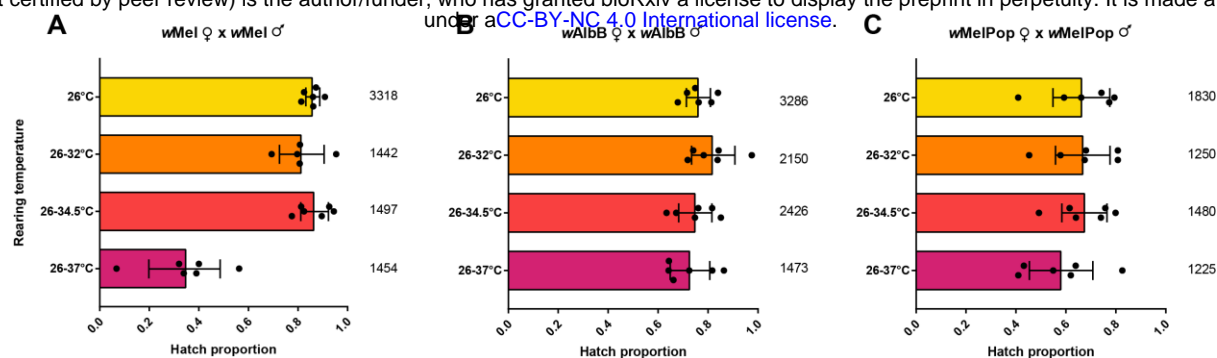

**Figure 1.** Proportion of eggs hatched from *Wolbachia*-infected females crossed to *Wolbachia*-infected males reared at different cyclical temperatures for the (A) *wMel*, (B) *wAlbB* and (C) *wMelPop* infections. Both sexes were reared under the same temperature regime and then crossed together at 26°C. Each data point shows the proportion of eggs hatched from a cage of 7 females and 7 males. Numbers for each bar denote the total number of eggs scored per cross. Error bars show 95% confidence intervals.

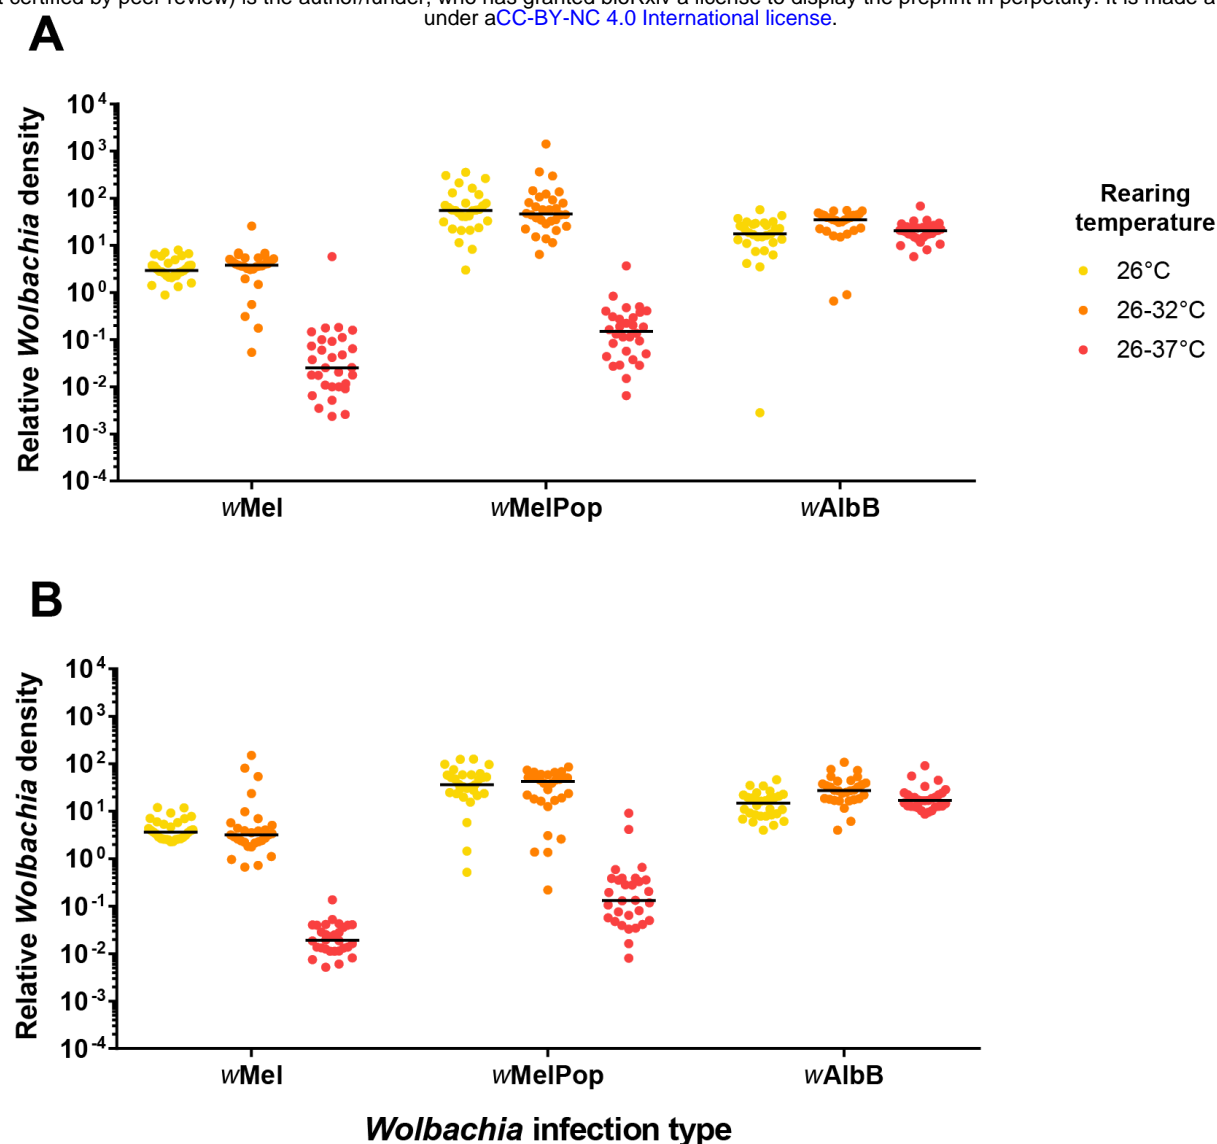

**Figure 2.** Relative *Wolbachia* density in (A) female and (B) male adults reared at a constant 26°C, cycling 26-32°C or cycling 26-37°C. Each mosquito was tested with mosquito-specific and *Wolbachia*-specific markers to obtain crossing point values (see “*Wolbachia* quantification”). Differences in crossing point between the two markers were transformed by  $2^n$  to obtain relative *Wolbachia* densities. Each data point represents the average of three technical replicates.

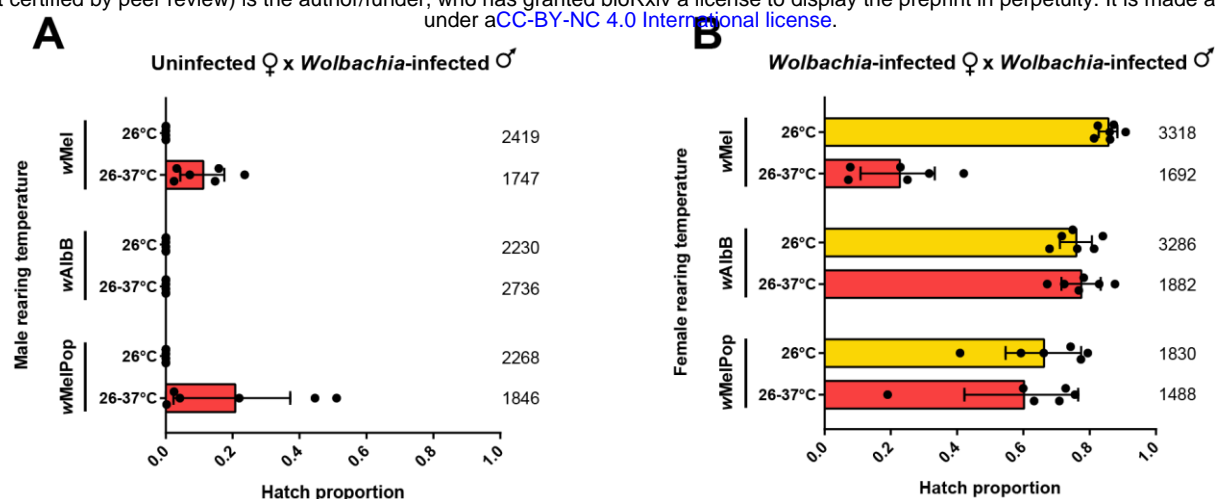

**Figure 3.** (A) Proportion of eggs hatched from uninfected females reared at 26°C and *Wolbachia*-infected males reared at either 26°C or a cycling 26-37°C. (B) Proportion of eggs hatched from *Wolbachia*-infected females reared at either 26°C or 26-37°C and *Wolbachia*-infected males of the same infection type reared at 26°C. For both sets of crosses, adults were mated at 26°C after a period of maturation. Each data point shows the proportion of eggs hatched from a cage of 7 females and 7 males. Numbers for each bar denote the total number of eggs scored per cross. Error bars show 95% confidence intervals.

**Table 1.** Proportion of *Wolbachia*-infected offspring produced by *w*Mel, *w*MelPop and *w*AlbB-

infected mothers when maintained at a constant 26°C or a cycling 26-37°C. Ten progeny from eight mothers, for a total of 80 progeny, were tested per treatment.

| <i>Wolbachia</i><br>infection type | Temperature | Maternal<br>transmission rate | Binomial confidence interval<br>(lower 95%, upper 95%) |
|------------------------------------|-------------|-------------------------------|--------------------------------------------------------|
| <i>w</i> Mel                       | 26°C        | 1                             | 0.955, 1                                               |
|                                    | 26-37°C     | 0                             | 0, 0.045                                               |
| <i>w</i> MelPop                    | 26°C        | 0.975                         | 0.912, 0.997                                           |
|                                    | 26-37°C     | 0                             | 0, 0.045                                               |
| <i>w</i> AlbB                      | 26°C        | 1                             | 0.955, 1                                               |
|                                    | 26-37°C     | 0.885                         | 0.792, 0.946                                           |
